# Supplementary material for: Hexagonal and Square Patterned Silver Nanowires/PEDOT:PSS Composite Grids by Screen Printing for Uniformly Transparent Heaters
Source: PubMed Central journal article supplement (PMC6473526; doi:10.3390/polym11030468), 2019-03-12
Supplement: polymers-11-00468-s001.pdf [file polymers-11-00468-s001.pdf]

# Hexagonal and Square Patterned Silver Nanowires/PEDOT:PSS Composite Grids by Screen Printing for Uniformly Transparent Heaters

Xin He <sup>1\*</sup>, Gengzhe Shen <sup>1</sup>, Ruibin Xu<sup>1</sup>, Weijia Yang<sup>1</sup>, Chi Zhang<sup>1</sup>, Zhihao Liu<sup>1</sup>, Bohua Chen<sup>1</sup>, Junyan Liu<sup>1</sup> and Mingxia Song<sup>2</sup>

<sup>1</sup> School of Applied Physics and Materials, Wuyi University, Jiangmen 529020, Guangdong Province, P.R. China;

<sup>2</sup> Collaborative Innovation Center of Atmospheric Environment and Equipment Technology, Jiangsu Key Laboratory of Atmospheric Environment Monitoring and Pollution Control, School of Environmental Science and Engineering, Nanjing University of Information Science & Technology, Nanjing, 210044, Jiangsu Province, P.R. China.

\* Correspondence: hexinwuyu@126.com; Tel.: +86-750-3296095

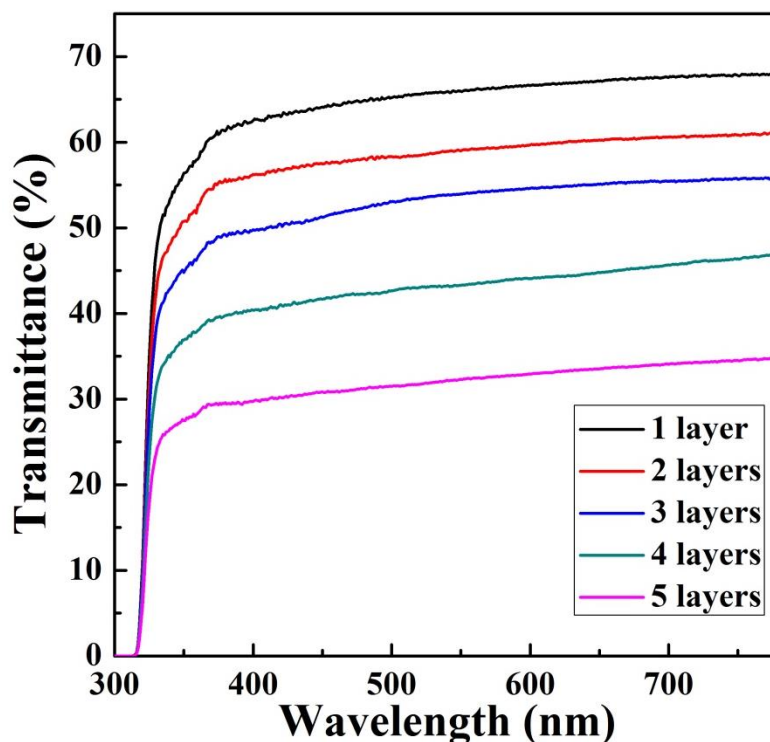

Figure S1 Optical transmittance spectra of the Ag NWs/PEDOT:PSS composite films without using patterned mesh, which were printed for 1 to 5 layers with the mass ratio of PEDOT:PSS to Ag NWs of 1:1.

Table S1 Comparison of the photoelectric properties of the Ag NWs/PEDOT:PSS composite films with and without using the patterned meshes.

| <b>Sample Name</b>       | <b>T and R for 1 layer</b> | <b>T and R for 2 layers</b> | <b>T and R for 3 layers</b> | <b>T and R for 4 layers</b> | <b>T and R for 5 layers</b> |
|--------------------------|----------------------------|-----------------------------|-----------------------------|-----------------------------|-----------------------------|
| <b>without pattern</b>   | 65.9%, 2.05 $\Omega$       | 59.0%, 1.51 $\Omega$        | 53.9%, 1.01 $\Omega$        | 43.3%, 0.89 $\Omega$        | 32.3%, 0.61 $\Omega$        |
| <b>hexagonal pattern</b> | 85.6%, 2.23 $\Omega$       | 83.9%, 2.08 $\Omega$        | 80.8%, 1.40 $\Omega$        | 78.4%, 0.98 $\Omega$        | 75.7%, 0.22 $\Omega$        |
| <b>square pattern</b>    | 77.3%, 8.78 $\Omega$       | 75.4%, 6.78 $\Omega$        | 73.6%, 5.32 $\Omega$        | 72.5%, 4.16 $\Omega$        | 70.5%, 2.78 $\Omega$        |
